# Supplementary material for: Improved identification of concordant and discordant gene expression signatures using an updated rank-rank hypergeometric overlap approach
Source: PubMed Central journal article supplement (PMC6018631; doi:10.1038/s41598-018-27903-2), 2018-06-25
Supplement: 41598_2018_27903_MOESM1_ESM.pdf [file 41598_2018_27903_MOESM1_ESM.pdf]

**-- Supplementary Information --**

**Improved identification of concordant and discordant gene expression signatures using an updated rank-rank hypergeometric overlap approach**

Kelly Cahill<sup>1,#</sup>, Zhiguang Huo<sup>1,2,#</sup>, George Tseng<sup>1,3</sup>,  
Ryan W. Logan<sup>4,5,6,\*</sup>, Marianne L. Seney<sup>4,5,\*</sup>

<sup>1</sup>Department of Biostatistics, Graduate School of Public Health, University of Pittsburgh, Pittsburgh, PA, USA

<sup>2</sup>Department of Biostatistics, College of Public Health & Health Professions College of Medicine, University of, Gainesville, FL, USA

<sup>3</sup>Department of Computational and Systems Biology, School of Medicine, University of Pittsburgh, Pittsburgh, PA, USA

<sup>4</sup>Department of Psychiatry, School of Medicine, University of Pittsburgh, Pittsburgh, PA, USA

<sup>5</sup>Translational Neuroscience Program, School of Medicine, University of Pittsburgh, Pittsburgh, PA, USA

<sup>6</sup>The Center For Systems Neurogenetics of Addiction, The Jackson Laboratory, Bar Harbor, ME, USA

\*Corresponding Authors

#These authors contributed equally to this work.

## Supporting Information

### Two-sided method

To overcome the limitations of the enrichment method, the original RRHO paper proposed a “two-sided” method. Under the two-sided method, the overlapping  $p$ -value will be calculated based on the relationship between the observed number of overlap,  $k$ , and the expected number of overlap,  $\bar{k}$ . A two-sided hypergeometric  $p$  value is calculated.

$$H(k; s, M, N) = \begin{cases} \sum_{j=0}^k h(j; s, M, N) & k \leq \bar{k} \\ \sum_{j=k}^s h(j; s, M, N) & k > \bar{k} \end{cases}$$

Where  $k \leq \bar{k}$  represents under enrichment and  $k > \bar{k}$  represents over enrichment. To further distinguish between them, the original RRHO paper further introduce a sign to distinguish under/over enrichment:

$$R(k; s, M, N) = \begin{cases} -|\log_{10} H(k; s, M, N)| & \text{if } k \leq \bar{k} \\ +|\log_{10} H(k; s, M, N)| & \text{if } k > \bar{k} \end{cases}$$

This sign convention for under/over enrichment involves a new symmetry property as  $R(k; s, M, N) = -R(s - k; s, N - M, N)$ , which makes the interpretation of quadrant A and D of **Figure 2** potentially interesting. The interpretation for the two-sided method is shown in **Supplementary Figures 1 and 2**. For each red dot, if  $k > \bar{k}$ , we have the exact same interpretation as the enrichment method (i.e., quadrants B and C are biologically meaningful, but quadrants A and D are not) (**Supplementary Figure 1**). When  $k \leq \bar{k}$ , however, the overlapping score is negative, so we will have biologically meaningful interpretation in quadrants A and D because of the symmetry property

induced by the sign convention, but not quadrants B and C. Under this scenario, a significant negative overlapping score in quadrant A of **Supplementary Figure 2** represents a significant concurrence of up-regulated genes in study 1 and down-regulated genes in study 2; and a significant negative overlapping score in quadrant D of **Supplementary Figure 2** represents a significant concurrence of up-regulated genes in study 2 and down-regulated genes in study 1. However, the interpretation of the heatmap colors can be misleading. A positive overlapping score in a discordant region reveals a red hotspot, however the overlapping areas are actually uninteresting (**Supplementary Figure S1**). Thus, interpretation of results from the two-sided method are challenging, with different rules applying to the concordant and discordant quadrants.

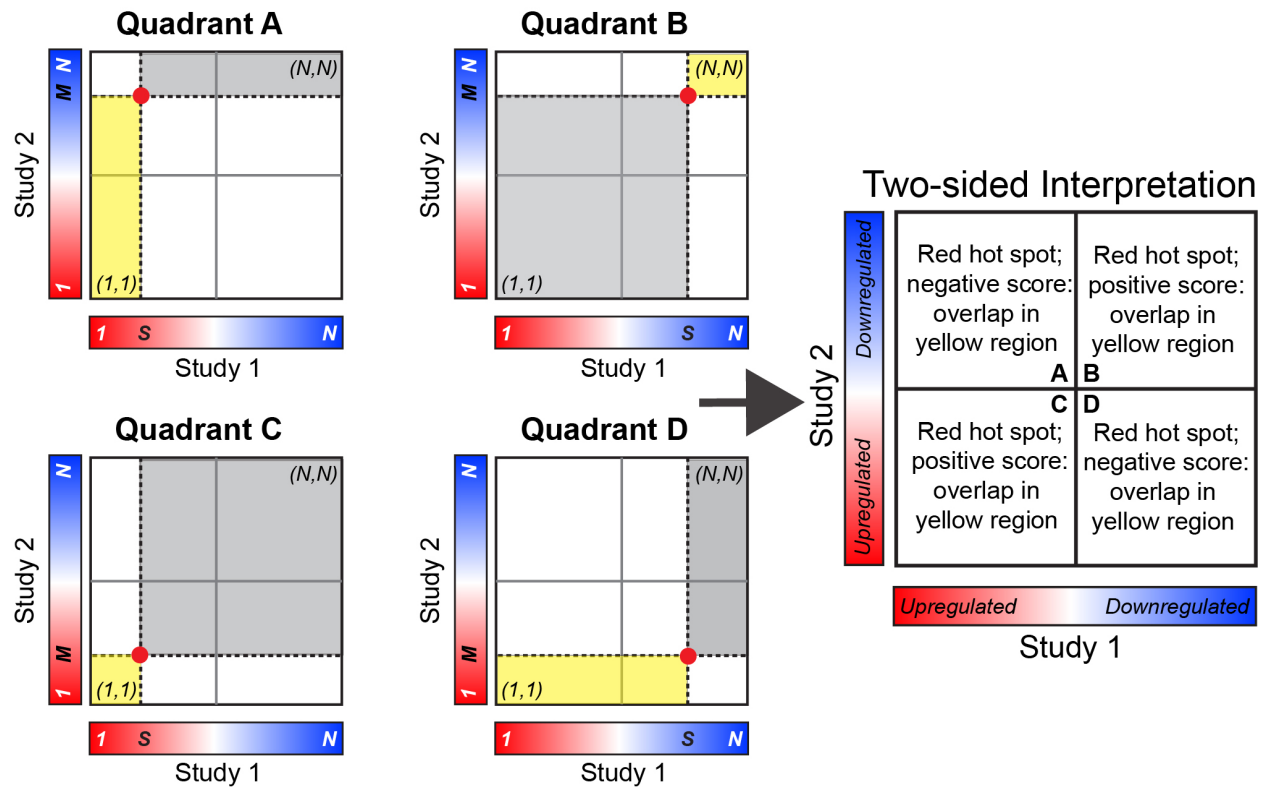

**Supplementary Figure 1. Interpretation of the two-sided RRHO method when the  $p$ -value score is positive.** When  $k > \bar{k}$ , we have the exact same interpretation as the enrichment method (i.e., quadrants B and C are biologically meaningful, but quadrants

A and D are not). When  $k \leq \bar{k}$ , the overlapping score is negative, so we will have biologically meaningful interpretation in quadrants A and D, but not quadrants B and C. Additionally, a positive overlapping score in quadrants A and D might show a red hotspot, but the overlapping areas are actually not interesting.

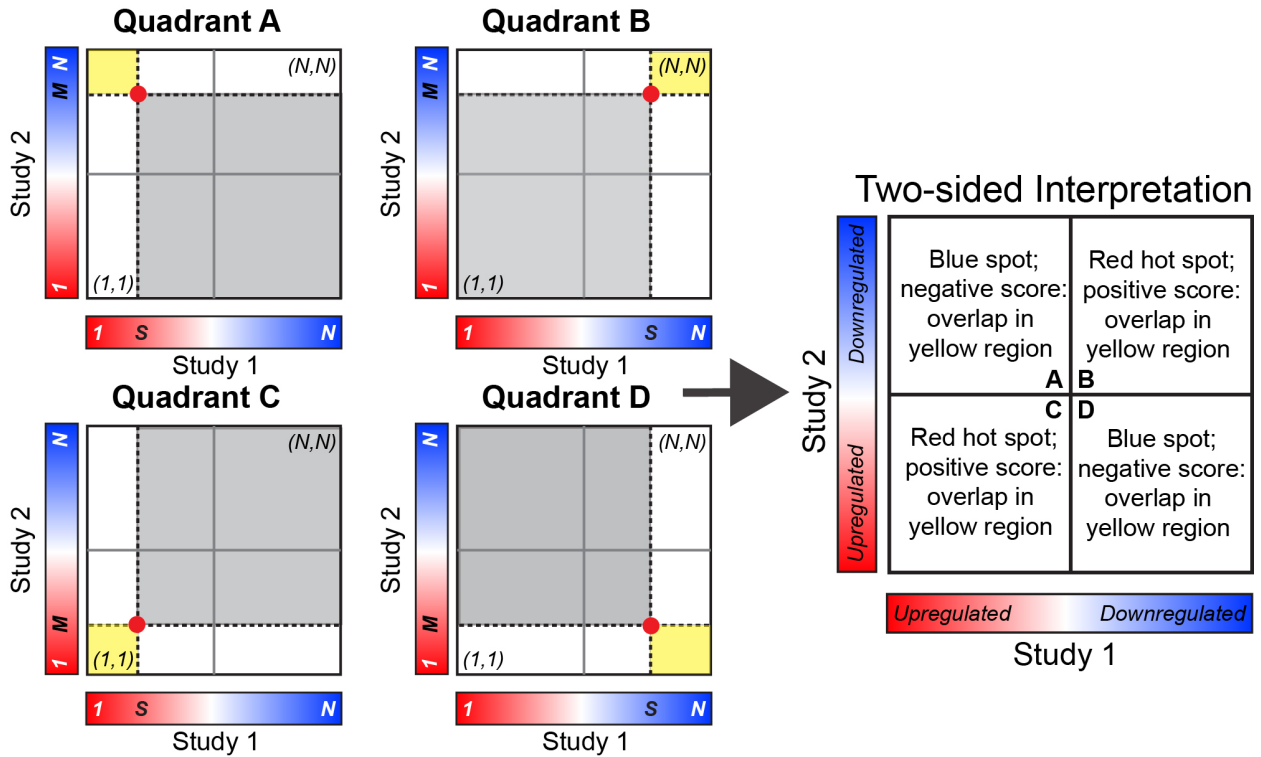

**Supplementary Figure 2. Interpretation of discordant quadrants in two-sided RRHO method.** For discordant quadrants A and D, a negative  $p$ -value score in addition to a blue hotspot indicates overlap of genes in the yellow areas. This is different from concordant quadrants B and C, which need positive  $p$ -values scores and red hotspots to indicate significant overlap. Thus, the two-sided method does indeed provide accurate information for the discordant quadrants; however, the interpretation is difficult.

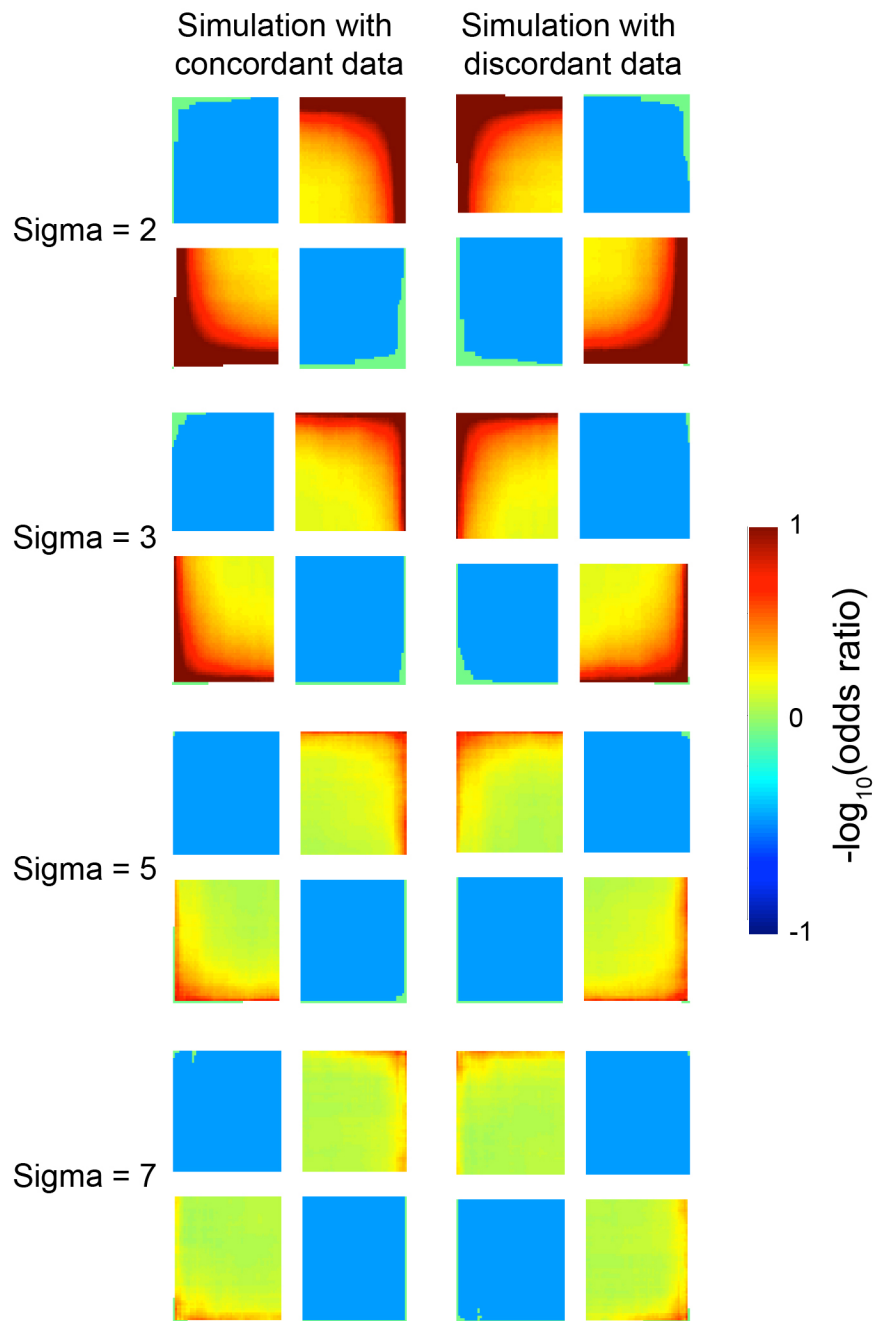

**Supplementary Figure 3. Concordant and discordant simulation using the effect size RRHO method.** We show that this method provides robust signal, even as the sigma (noise) value increases.

Scale displayed as  $-\log_{10}(p\text{-value})$

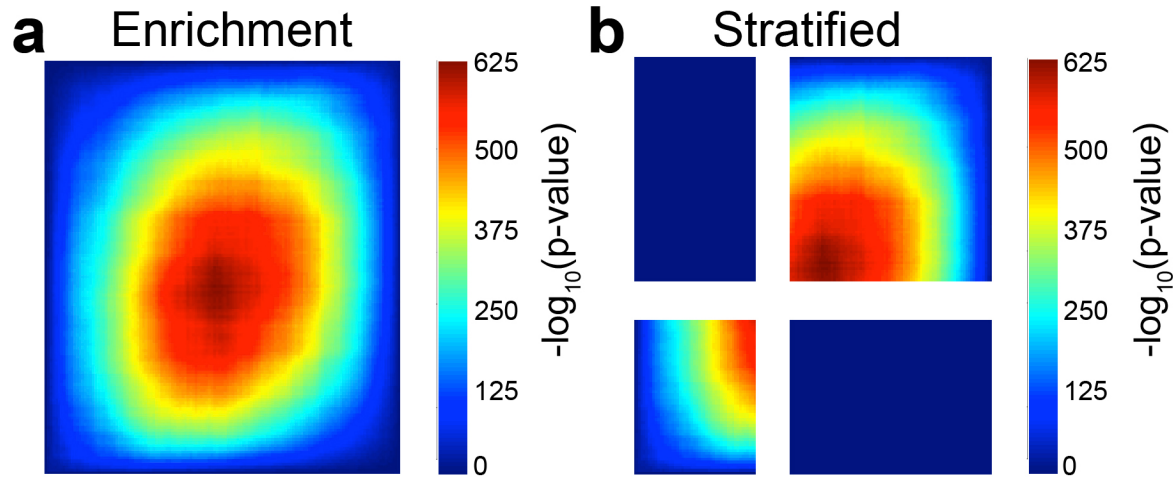

Scale displayed as  $-\log_e(p\text{-value})$

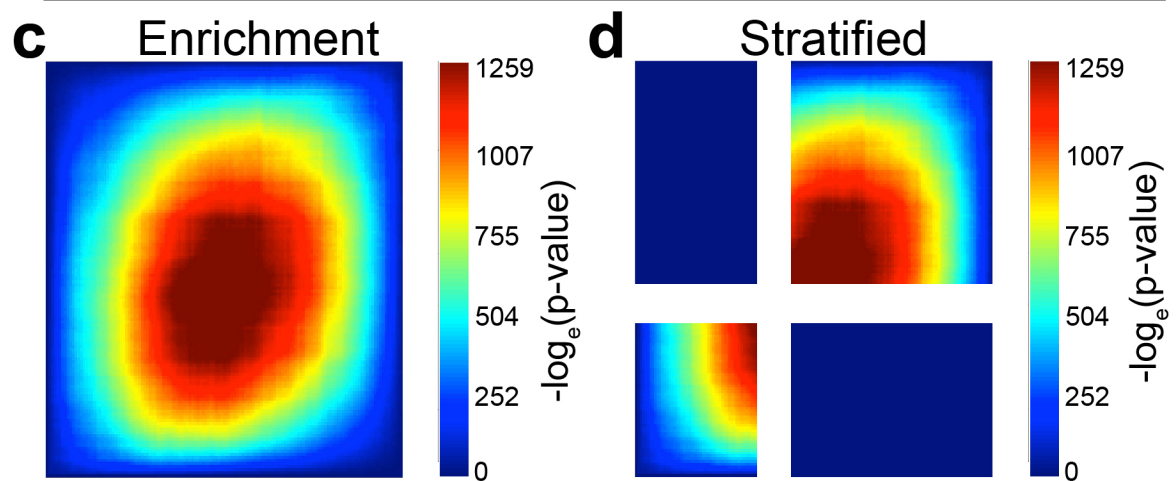

**Supplementary Figure 4. Heatmaps generated using real data<sup>1</sup>** (a) Enrichment using  $-\log_{10}(p\text{-value})$  scale; (b) Stratified method using  $-\log_{10}(p\text{-value})$  scale; (c) Enrichment using  $-\log_e(p\text{-value})$  scale; (d) Stratified method using  $-\log_e(p\text{-value})$  scale.

## References

- 1 Pena, C. J. *et al.* Early life stress confers lifelong stress susceptibility in mice via ventral tegmental area OTX2. *Science* **356**, 1185-1188, doi:10.1126/science.aan4491 (2017).
